# Supplementary material
Source: PubMed Central journal article supplement (PMC9191207)
Supplement: btac310_supplementary_data.pdf [file btac310_supplementary_data.pdf]

## **Supplementary Materials**

## Text S1

Because  $O_r$  is orthogonal to  $(Z, T)$ , it follows from the inverse regression model (3) that

$$E(M_j|Z, T) = E_{O_r} \{E(M_j|Z, T, O_r)\} = \beta_{0,j} + \beta_{Z,j}^T Z + \beta_{1,j} T_r,$$

which is the mediator model (1) except that  $T_r$  is used in place of  $T$ . Since  $T_r$  is the residual of  $T$  after orthogonalizing against  $Z$ , the coefficients for  $T$  and  $T_r$  should be the same, i.e.,

$$\beta_{1,j} = \alpha_{1,j}.$$

If we assume that the mediators  $M_1, M_2, \dots, M_J$  are independent of each other conditional on  $(Z, T)$ , then from the forward outcome model (2) that models the joint effects of all mediators, we obtain the forward outcome model that models the marginal effect of mediator  $M_j$ :

$$E(O|Z, T, M_j) = \theta_0 + \theta_Z^T Z + \theta_1 T + \theta_{2,j} M_j. \quad (\text{S1})$$

Comparing (S1) with the inverse regression model (3), we find that the positions of  $O$  (or  $O_r$ ) and  $M_j$  are exchanged and it is well known that  $\beta_{2,j} \neq \theta_{2,j}$  in this case. However, both  $\beta_{2,j}$  in (3) and  $\theta_{2,j}$  in (S1) capture the association between  $O$  and  $M_j$  conditional on  $(Z, T)$ , so  $\beta_{2,j} = 0$  and  $\theta_{2,j} = 0$  coincide. This result easily extends to cases when the mediators  $M_1, M_2, \dots, M_J$  are correlated, because our approach focuses on testing *marginal* mediation effects instead of *conditional* mediation effects.

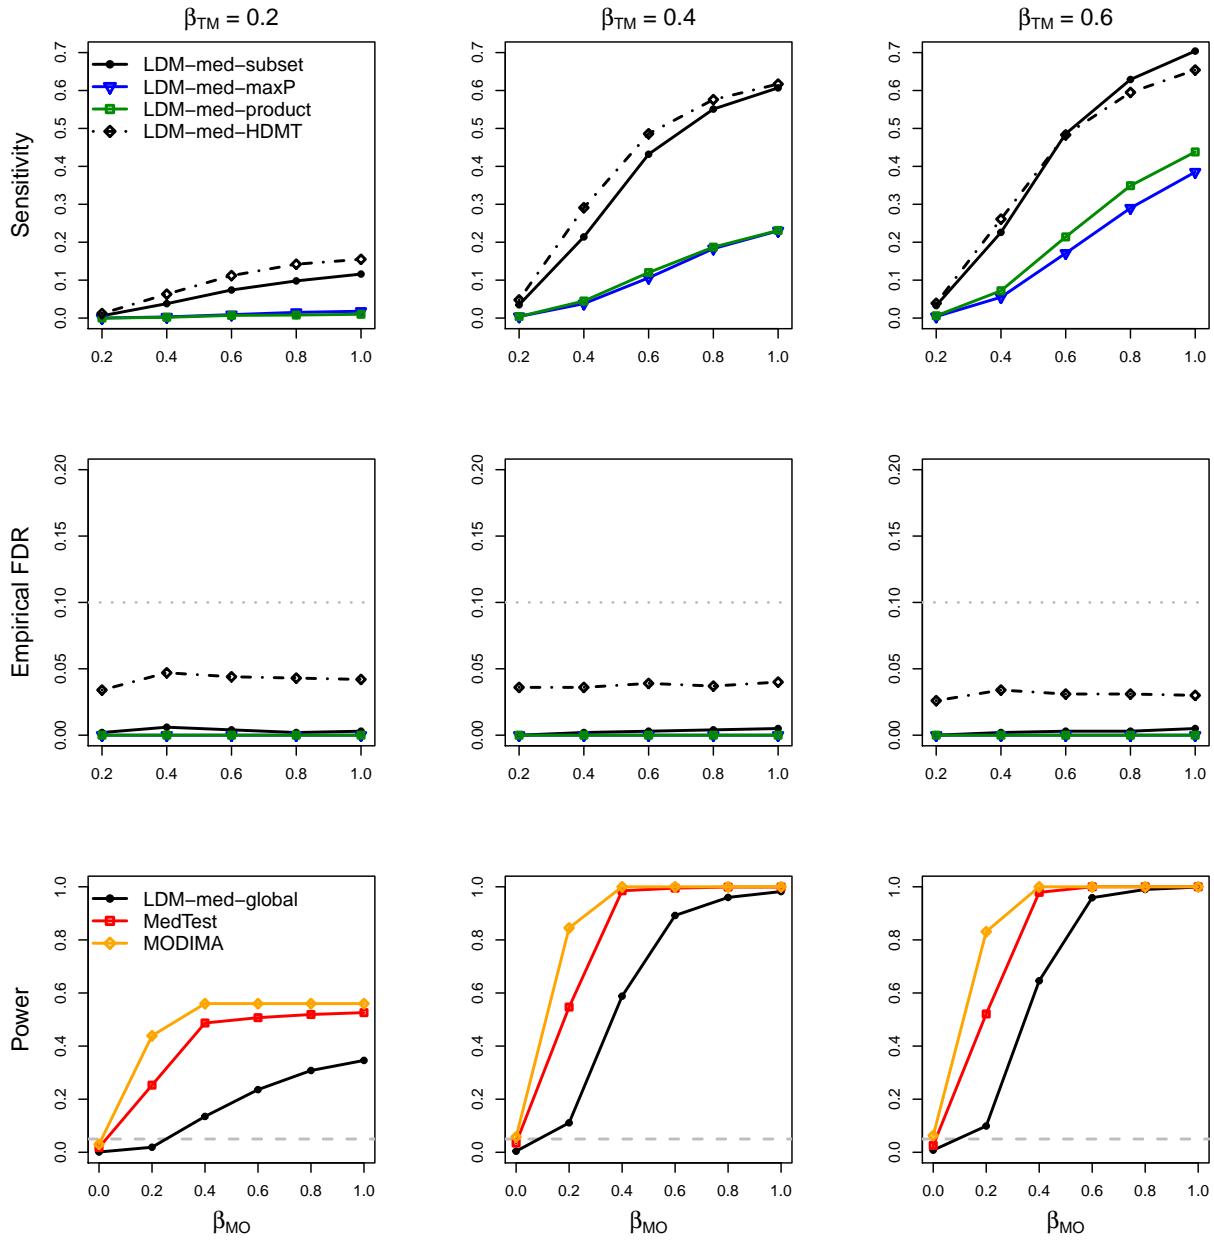

Figure S1: Simulation results in M-common with a continuous outcome and no confounder, in the absence of type-I and type-II null taxa.

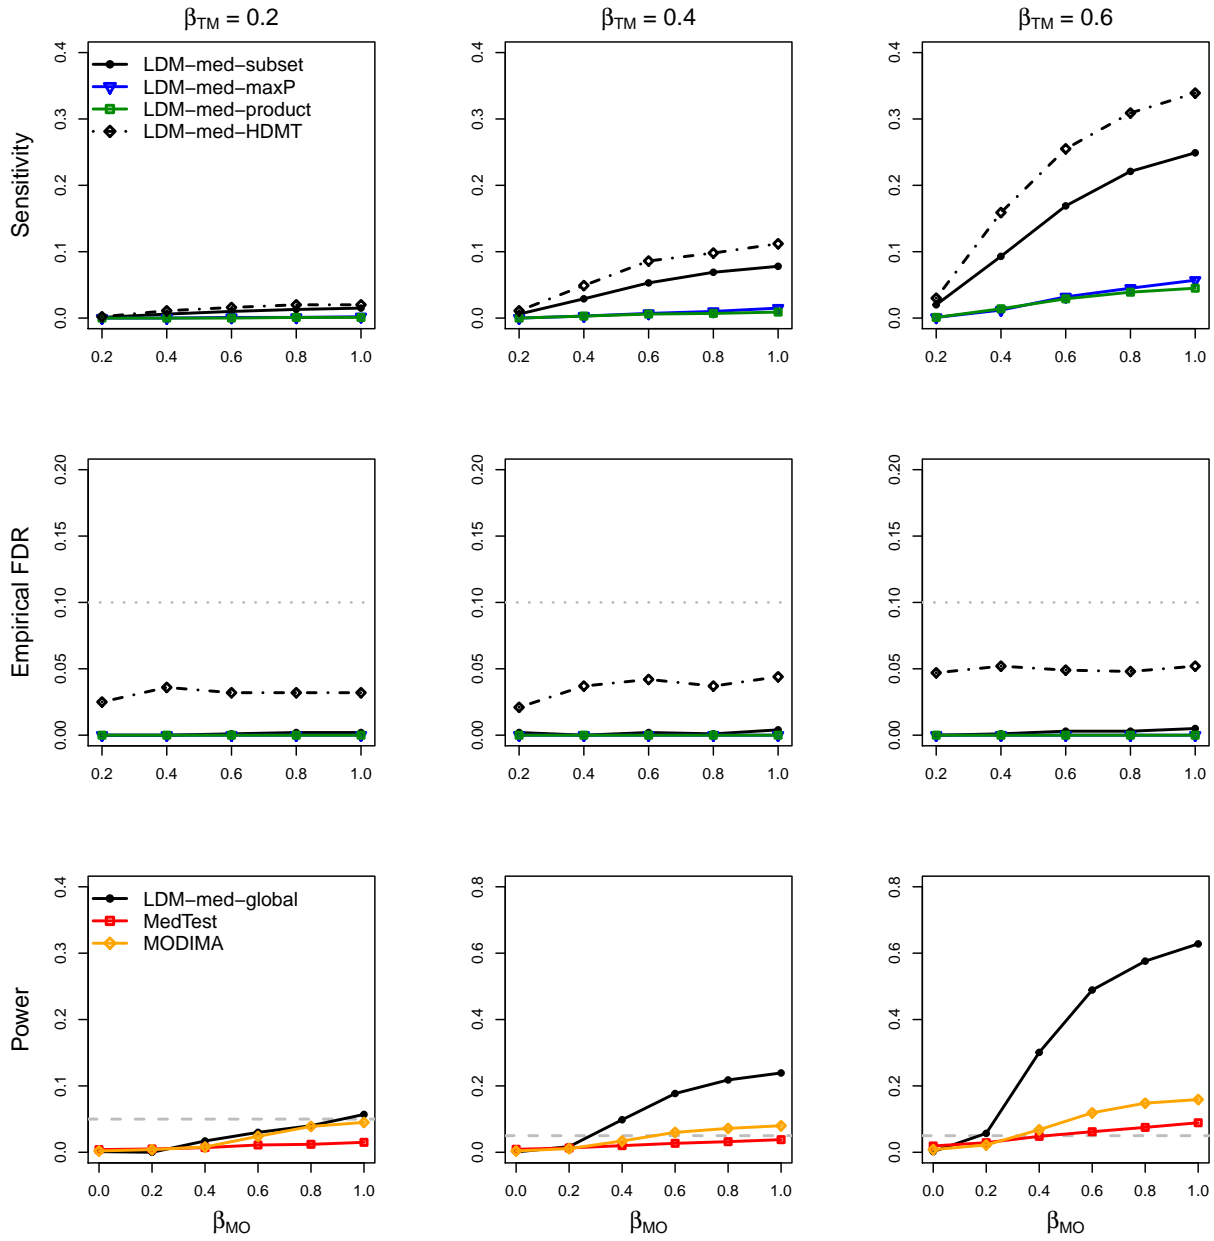

Figure S2: Simulation results in M-rare with a continuous outcome and no confounder, in the absence of type-I and type-II null taxa.

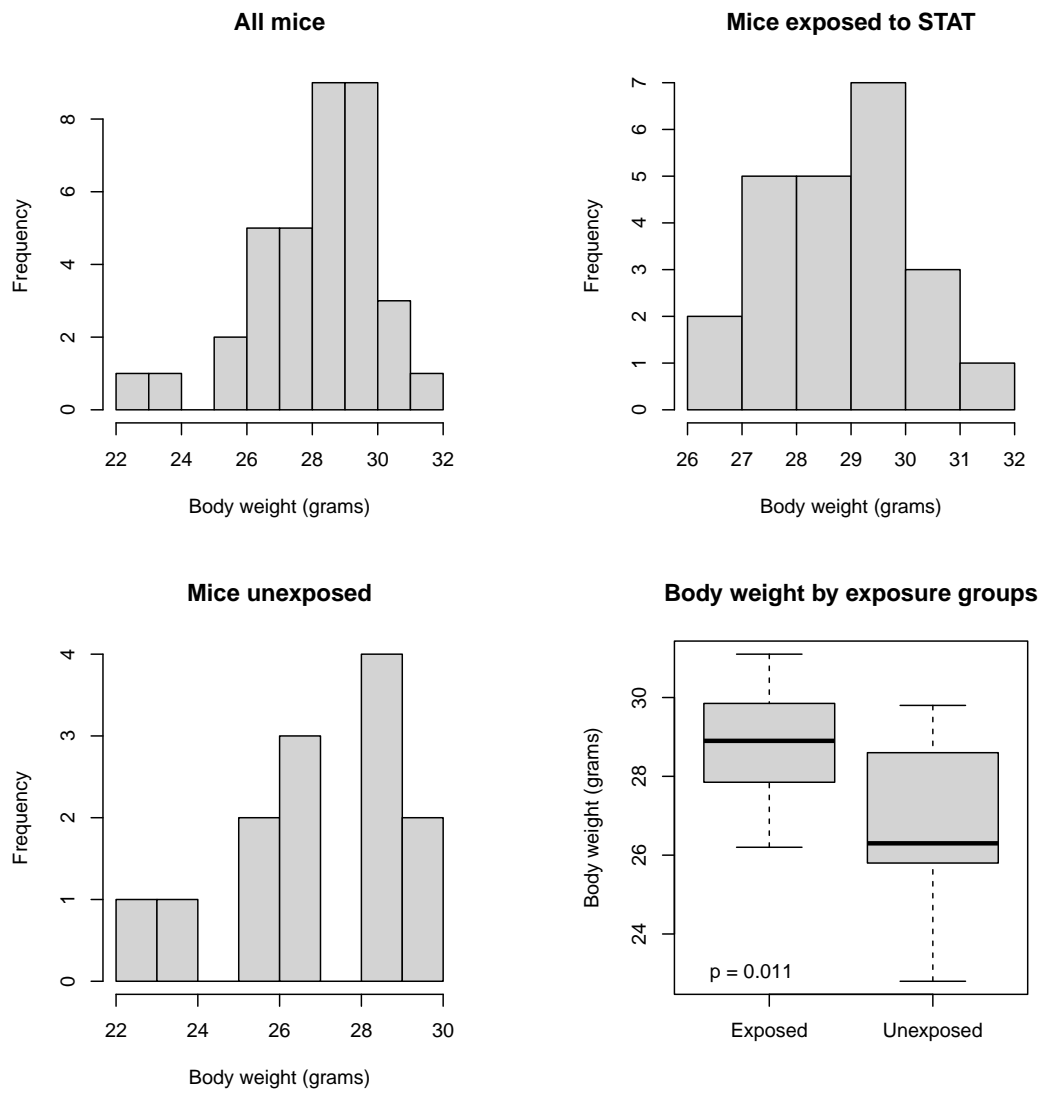

Figure S3: Distribution of the body weight values in the murine microbiome dataset.

Table S1: Type I error (at level 0.05) of the global tests in M-common and M-rare with a continuous outcome and no confounder, in 12 scenarios under the global null

|          | $\beta_{TM}$ | $\beta_{MO}$ | $\alpha_{TM}$ | $\alpha_{MO}$ | Type(s) of null | LDM-med-global | MedTest | MODIMA |       |
|----------|--------------|--------------|---------------|---------------|-----------------|----------------|---------|--------|-------|
| M-common | 0.0          | 0.4          | 0.0           | 0.0           | II              | 0.004          | 0.028   | 0.048  |       |
|          |              |              |               | 0.4           | II              | 0.005          | 0.028   | 0.048  |       |
|          |              |              | 0.6           | 0.0           | 0.0             | I, II          | 0.010   | 0.577  | 0.995 |
|          |              |              |               |               | 0.4             | I, II          | 0.009   | 0.610  | 0.997 |
|          | 0.6          | 0.0          | 0.0           | 0.0           | I               | 0.008          | 0.026   | 0.063  |       |
|          |              |              |               | 0.4           | I, II           | 0.010          | 0.102   | 0.767  |       |
|          |              |              | 0.6           | 0.0           | 0.0             | I              | 0.012   | 0.030  | 0.059 |
|          |              |              |               |               | 0.4             | I, II          | 0.014   | 0.092  | 0.750 |
|          | 0.0          | 0.0          | 0.0           | 0.0           | III             | 0.000          | 0.004   | 0.003  |       |
|          |              |              |               | 0.4           | II              | 0.005          | 0.018   | 0.039  |       |
|          |              |              | 0.6           | 0.0           | 0.0             | I              | 0.006   | 0.030  | 0.053 |
|          |              |              |               |               | 0.4             | I, II          | 0.009   | 0.317  | 0.813 |
| M-rare   | 0.0          | 0.4          | 0.0           | 0.0           | II              | 0.002          | 0.010   | 0.013  |       |
|          |              |              |               | 0.4           | II              | 0.003          | 0.020   | 0.039  |       |
|          |              |              | 0.6           | 0.0           | 0.0             | I, II          | 0.009   | 0.085  | 0.233 |
|          |              |              |               |               | 0.4             | I, II          | 0.009   | 0.297  | 0.827 |
|          | 0.6          | 0.0          | 0.0           | 0.0           | I               | 0.002          | 0.019   | 0.008  |       |
|          |              |              |               | 0.4           | I, II           | 0.006          | 0.055   | 0.139  |       |
|          |              |              | 0.6           | 0.0           | 0.0             | I              | 0.008   | 0.044  | 0.051 |
|          |              |              |               |               | 0.4             | I, II          | 0.011   | 0.332  | 0.807 |
|          | 0.0          | 0.0          | 0.0           | 0.0           | III             | 0.000          | 0.004   | 0.003  |       |
|          |              |              |               | 0.4           | II              | 0.005          | 0.018   | 0.039  |       |
|          |              |              | 0.6           | 0.0           | 0.0             | I              | 0.006   | 0.030  | 0.053 |
|          |              |              |               |               | 0.4             | I, II          | 0.009   | 0.317  | 0.813 |

Note: see the Note to Table 1.

Table S2: Type I error (at level 0.05) of the global tests in M-mixed with a confounder and a continuous outcome, in 3 scenarios under the global null

|                                  | $\beta_{\text{TM}}$ | $\beta_{\text{MO}}$ | LDM-med-global | LDM-med-global* | MedTest |
|----------------------------------|---------------------|---------------------|----------------|-----------------|---------|
| Adjusting for the confounder     | 0.0                 | 0.4                 | 0.007          | 0.073           | 0.026   |
|                                  | 0.6                 | 0.0                 | 0.004          | 0.069           | 0.020   |
| Not adjusting for the confounder | 0.0                 | 0.0                 | 0.001          | 0.042           | 0.005   |
|                                  | 0.0                 | 0.4                 | 0.023          | 0.119           | 0.034   |
|                                  | 0.6                 | 0.0                 | 0.016          | 0.108           | 0.032   |
|                                  | 0.0                 | 0.0                 | 0.001          | 0.024           | 0.006   |

Note: we set  $\alpha_{\text{TM}} = 0.0$  and  $\alpha_{\text{MO}} = 0.0$ . LDM-med-global\* is a variant of LDM-med-global that uses the information on the type of null for each taxa (only available in simulations). The type I error rates 0.073 and 0.069 after adjusting for the confounder were slightly inflated, due to the small sample size 100, and was reduced to 0.067 and 0.055 when the sample size was increased to 200.

Table S3: Bivariate association analyses of the murine microbiome dataset

|                               | Day 28                                                                                                                                                                                                                                                                                                                                                                                                                                                                                                                                                                                                       | Days 21 & 28                                                                                                                                                                                                                                                                                                                                                                                                                                                                                                              |
|-------------------------------|--------------------------------------------------------------------------------------------------------------------------------------------------------------------------------------------------------------------------------------------------------------------------------------------------------------------------------------------------------------------------------------------------------------------------------------------------------------------------------------------------------------------------------------------------------------------------------------------------------------|---------------------------------------------------------------------------------------------------------------------------------------------------------------------------------------------------------------------------------------------------------------------------------------------------------------------------------------------------------------------------------------------------------------------------------------------------------------------------------------------------------------------------|
| Exposure–microbiome           |                                                                                                                                                                                                                                                                                                                                                                                                                                                                                                                                                                                                              |                                                                                                                                                                                                                                                                                                                                                                                                                                                                                                                           |
| Detected taxa (FDR = 20%)     | <i>Candidatus Arthromitus</i><br><i>Turicibacter</i><br><i>Clostridium.1</i><br><i>RF39</i><br><i>Dehalobacterium</i><br><i>Clostridiales</i><br><i>Ruminococcus</i><br><i>Clostridiaceae</i><br><i>rc4-4</i><br><i>Oscillospira</i><br><i>Dorea</i><br><i>[Ruminococcus]</i><br><i>Allobaculum</i><br><i>Enterococcus</i><br><i>Lactobacillus</i><br><i>[Mogibacteriaceae]</i><br><i>Rikenellaceae</i><br><i>Erysipelotrichaceae</i><br><i>Anaeroplasma</i><br><i>Clostridium</i><br><i>Adlercreutzia</i><br><i>Coprococcus</i><br><i>Akkermansia</i><br><i>Ruminococcaceae</i><br><i>Coriobacteriaceae</i> | <i>Candidatus Arthromitus</i><br><i>Turicibacter</i><br><i>Clostridium.1</i><br><i>RF39</i><br><i>Dehalobacterium</i><br><i>Clostridiales</i><br><i>Ruminococcus</i><br><i>Clostridiaceae</i><br><i>rc4-4</i><br><i>Oscillospira</i><br><i>Dorea</i><br><i>[Ruminococcus]</i><br><i>Allobaculum</i><br><i>Enterococcus</i><br><i>[Mogibacteriaceae]</i><br><i>Erysipelotrichaceae</i><br><br><i>Clostridium</i><br><i>Adlercreutzia</i><br><br><i>Akkermansia</i><br><br><i>Anaerostipes</i><br><i>Enterobacteriaceae</i> |
| Microbiome–outcome   exposure |                                                                                                                                                                                                                                                                                                                                                                                                                                                                                                                                                                                                              |                                                                                                                                                                                                                                                                                                                                                                                                                                                                                                                           |
| Detected taxa (FDR = 20%)     | <i>[Ruminococcus]</i><br><i>Clostridium</i><br><i>Candidatus.Arthromitus</i><br><i>Ruminococcus</i><br><i>Clostridiales</i>                                                                                                                                                                                                                                                                                                                                                                                                                                                                                  | <i>[Ruminococcus]</i>                                                                                                                                                                                                                                                                                                                                                                                                                                                                                                     |
